# Supplementary material for: The effect of the enhanced recovery programme on long-term survival following liver resection for colorectal liver metastases
Source: PubMed Central journal article supplement (PMC10279559; doi:10.1007/s00423-023-02968-4), 2023-06-19
Supplement: 423_2023_2968_MOESM1_ESM.pdf [file 423_2023_2968_MOESM1_ESM.pdf]

# Elective Liver Resection Enhanced Recovery Protocol

# PROOF

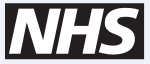

**East Lancashire Hospitals NHS Trust**  
A University Teaching Trust

(Attach patient label here)

Hospital No: ..... DOB: .....

First Name: ..... M / F: ..... Religion: .....

Last Name: ..... GP: .....

Address: .....

.....

NHS No: .....

Admission Date: \_\_\_\_\_

Expected Length of Stay: \_\_\_\_\_

Planned Discharge Date: \_\_\_\_\_

Consultant: \_\_\_\_\_

This protocol is to be used as a prompt for compliance with the Enhanced Recovery patient pathway. It does not constitute a prescription. Please ensure the document is commenced in Pre-operative Assessment and accompanies the patient at all times and is utilised during nursing handovers and ward rounds.

Please ✓ for all instructions achieved and X if not achieved and document as a variance with rationale. If any instruction is inappropriate for an individual patient then that should be altered and documented as a variance with rationale. The patient will still benefit from the remainder of the protocol.

- Day 0 Patient admission
- Day 4-5 Expected discharge date for laparoscopic liver resection
- Day 8-10 Expected discharge date for open/laparoscopic converted procedure

| Date | Staff Name | Signature | Initial | Designation | Bleep/Ward |
|------|------------|-----------|---------|-------------|------------|
|      |            |           |         |             |            |
|      |            |           |         |             |            |
|      |            |           |         |             |            |
|      |            |           |         |             |            |
|      |            |           |         |             |            |
|      |            |           |         |             |            |
|      |            |           |         |             |            |
|      |            |           |         |             |            |
|      |            |           |         |             |            |
|      |            |           |         |             |            |
|      |            |           |         |             |            |
|      |            |           |         |             |            |
|      |            |           |         |             |            |
|      |            |           |         |             |            |
|      |            |           |         |             |            |
|      |            |           |         |             |            |
|      |            |           |         |             |            |
|      |            |           |         |             |            |
|      |            |           |         |             |            |
|      |            |           |         |             |            |
|      |            |           |         |             |            |
|      |            |           |         |             |            |
|      |            |           |         |             |            |
|      |            |           |         |             |            |

## Enhanced Recovery Programme (ERP) Guidelines for Surgery

Each operation will have a protocol that is specific to that surgery. Please use these to guide you.  
Any instructions not achieved should be documented as a variance with rationale in the ward documentation/notes

Please see the ELHT intranet (under anaesthetics) for ERP guidelines on:-

- Enhanced Recovery Operational Policy
- Perioperative Fasting guideline
- Anaesthesia guidelines for Liver
- Anaesthesia Enhanced Recovery guidelines
- Goal Directed Fluid Therapy (GDFT) guidelines
- Postoperative Hypotension / Epidural Management guideline on the Enhanced Recovery Programme
- Fluid guidelines (ELHT IV Fluid therapy guideline - Adults)
- Acute Pain Team Guidelines
- Mobilising Enhanced Recovery Patients on Critical Care guideline

| Protocol Instruction                                                                | Achieved<br>✓ or ✗ | Signature |
|-------------------------------------------------------------------------------------|--------------------|-----------|
| Verbal information on Enhanced Recovery given                                       |                    |           |
| Enhanced Recovery booklet given and explained                                       |                    |           |
| Eido leaflet given on operation                                                     |                    |           |
| Eido leaflet given on anaesthetic                                                   |                    |           |
| Eido leaflet given on pain relief after surgery                                     |                    |           |
| Information leaflet on venous thromboembolism (VTE) given                           |                    |           |
| Preventing falls in hospital information leaflet given                              |                    |           |
| Smoking cessation, health and wellbeing advice given                                |                    |           |
| Deep breathing and limb exercises advice given                                      |                    |           |
| Importance of post-operative nutrition advice given                                 |                    |           |
| Importance of post-operative early mobilisation advice given                        |                    |           |
| Preload sachets given with printed information sheet (unless a diabetic on insulin) |                    |           |
| Patient advised to bring sugar free chewing gum                                     |                    |           |

Day before Surgery

Date: \_\_\_\_\_

| Protocol Instruction                                                              | Achieved<br>✓ or x | Signature |
|-----------------------------------------------------------------------------------|--------------------|-----------|
| Normal diet                                                                       |                    |           |
| If INR ≤1.5 give low molecular weight Heparin at 18:00 hours (to be given in leg) |                    |           |

Day of Surgery Pre-Operatively

Date: \_\_\_\_\_

|                                                                       |  |  |
|-----------------------------------------------------------------------|--|--|
| Weigh patient on admission and document (Kgs) in notes                |  |  |
| Clear fluids only from midnight                                       |  |  |
| Preload at 06.00                                                      |  |  |
| Nil by mouth from 06:00 after Pre-load                                |  |  |
| Pre-operative Gabapentin given                                        |  |  |
| Antiembotic stockings in situ                                         |  |  |
| Post-operative pain relief advice given                               |  |  |
| Deep breathing and limb exercises advice reiterated                   |  |  |
| Importance of post-operative nutrition advice reiterated              |  |  |
| Importance of early mobilisation advice reiterated                    |  |  |
| Check patient has ERP booklet and advise to complete post-operatively |  |  |

**This page is to be completed in theatre by theatre staff**

**Anaesthesia:**

| Protocol Instruction                                                     | Achieved<br>√ or x | Signature |
|--------------------------------------------------------------------------|--------------------|-----------|
| Intra-operative Goal Directed Fluid Therapy (GDFT)                       |                    |           |
| GDFT documentation completed                                             |                    |           |
| Primary analgesic technique as per Acute Pain Team guideline             |                    |           |
| Multimodal antiemesis intraoperatively                                   |                    |           |
| Maintain normothermia                                                    |                    |           |
| Post-op fluid prescribed as per ELHT IV Fluid therapy guidelines - Adult |                    |           |
| Referral form to Acute Pain Team completed                               |                    |           |
| Post-operative primary and rescue analgesia prescribed                   |                    |           |
| Post-operative Paracetamol prescribed regularly                          |                    |           |
| Post-operative Gabapentin prescribed regularly                           |                    |           |
| Post-operative Buccastem prescribed regularly                            |                    |           |

**OPCS Coding:**

|                                                                                                                                                     |  |  |
|-----------------------------------------------------------------------------------------------------------------------------------------------------|--|--|
| Liaise with the surgeon and ensure the correct 5-digit OPCS codes for surgery and co-morbidities have been entered into TheatreMan post-operatively |  |  |
| For Intra-operative goal directed fluid therapy (GDFT) please ensure the OPCS code Y73.6 has been added                                             |  |  |

Day of Surgery Post-Op (Day 0)      Date: \_\_\_\_\_      Ward: \_\_\_\_\_

**Communication**

| Protocol Instruction                      | Achieved<br>√ or x | Signature |
|-------------------------------------------|--------------------|-----------|
| Follow post-operative instructions        |                    |           |
| Patient aware of today's goals            |                    |           |
| Encourage patient to complete their diary |                    |           |

**Pain**

|                                                                                                                                          |  |  |
|------------------------------------------------------------------------------------------------------------------------------------------|--|--|
| Monitor pain and side-effects of analgesia. Please use the primary analgesic observation sheet and Acute Pain Team guidelines for advice |  |  |
|------------------------------------------------------------------------------------------------------------------------------------------|--|--|

**Deep Breathing & Mobility**

|                                                      |  |  |
|------------------------------------------------------|--|--|
| All staff to promote deep breathing exercises        |  |  |
| Sit patient upright in bed within 6 hours of surgery |  |  |
| Antiembolic stockings in situ                        |  |  |
| Flotrons in situ                                     |  |  |
| All staff to promote leg exercises                   |  |  |

**Eating & Drinking**

|                                                                                                                         |  |  |
|-------------------------------------------------------------------------------------------------------------------------|--|--|
| Ensure Buccastem is prescribed and given regularly                                                                      |  |  |
| Encourage free fluids immediately                                                                                       |  |  |
| Fluid input IV and or oral as per Trust guidelines.                                                                     |  |  |
| Ensure any temporarily unused cannulas are flushed PRN to remain patent. Complete Visual Infusion Phlebitis (VIP) score |  |  |
| Encourage three supplement drinks a day                                                                                 |  |  |
| Offer evening meal / light diet                                                                                         |  |  |

**Elimination**

|                                     |  |  |
|-------------------------------------|--|--|
| Maintain accurate fluid balance     |  |  |
| Document bowel sounds and movements |  |  |

**Infection**

|                                                   |  |  |
|---------------------------------------------------|--|--|
| Maintain normothermia, report pyrexia to surgeons |  |  |
| Check surgical wound, dressing, drains            |  |  |

**Observations**

|                                                                |  |  |
|----------------------------------------------------------------|--|--|
| Early Warning Score (EWS) documented with regular observations |  |  |
|----------------------------------------------------------------|--|--|

PROOF

**Communication**

| Protocol Instruction                      | Achieved<br>√ or x | Signature |
|-------------------------------------------|--------------------|-----------|
| Patient aware of today's goals            |                    |           |
| Encourage patient to complete their diary |                    |           |

**Pain**

|                                         |  |  |
|-----------------------------------------|--|--|
| Ensure Acute Pain Team aware of patient |  |  |
| Follow Acute Pain Team plan             |  |  |

**Deep Breathing & Mobility**

|                                                                                                  |                  |  |
|--------------------------------------------------------------------------------------------------|------------------|--|
| All staff to promote deep breathing exercises                                                    |                  |  |
| All staff to promote leg exercises                                                               |                  |  |
| Referral to Physiotherapy                                                                        |                  |  |
| If INR ≤1.5 give low molecular weight Heparin at 18:00 hours (to be given in leg)                |                  |  |
| If INR ≥1.5 let surgeons know                                                                    |                  |  |
| Antiembolic stockings in situ                                                                    |                  |  |
| Sit patient out of bed in chair:<br>(If in Critical Care, see mobilising ERP patients guideline) | For breakfast    |  |
|                                                                                                  | For lunch        |  |
|                                                                                                  | For evening meal |  |
| Walk 60 metres (once)                                                                            |                  |  |
| Walk 60 metres (twice)                                                                           |                  |  |

**Eating & Drinking**

|                                                                                                                         |         |  |
|-------------------------------------------------------------------------------------------------------------------------|---------|--|
| Referral to dietitian if MUST score ≥2                                                                                  |         |  |
| Buccastem given regularly                                                                                               |         |  |
| Encourage free fluids                                                                                                   |         |  |
| Fluid input IV and or oral as per Trust guidelines.                                                                     |         |  |
| Ensure any temporarily unused cannulas are flushed PRN to remain patent. Complete Visual Infusion Phlebitis (VIP) score |         |  |
| Gives 3 supplement drinks a day, chart on fluid balance:                                                                | Drink 1 |  |
|                                                                                                                         | Drink 2 |  |
|                                                                                                                         | Drink 3 |  |
| Encourage three meals a day in addition to supplements                                                                  |         |  |
| Sugar free chewing gum given 15 mins tds                                                                                |         |  |

**Elimination**

|                                     |  |  |
|-------------------------------------|--|--|
| Maintain accurate fluid balance     |  |  |
| Document bowel sounds and movements |  |  |

**Infection**

|                                         |  |  |
|-----------------------------------------|--|--|
| Report pyrexia to surgeons              |  |  |
| Surgical review, consider drain removal |  |  |
| Check surgical wound, dressings         |  |  |

**Observations**

|                                                                |  |  |
|----------------------------------------------------------------|--|--|
| Early Warning Score (EWS) documented with regular observations |  |  |
|----------------------------------------------------------------|--|--|

**Communication**

| Protocol Instruction                                      | Achieved<br>√ or x | Signature |
|-----------------------------------------------------------|--------------------|-----------|
| Patient aware of today's goals                            |                    |           |
| Encourage patient to complete their diary                 |                    |           |
| Begin discharge planning, see discharge plan on back page |                    |           |

**Pain**

|                                         |  |  |
|-----------------------------------------|--|--|
| Ensure Acute Pain Team aware of patient |  |  |
| Follow Acute Pain Team plan             |  |  |

**Deep breathing & Mobility**

|                                                                                                  |                                                |  |
|--------------------------------------------------------------------------------------------------|------------------------------------------------|--|
| All staff promote deep breathing exercises                                                       |                                                |  |
| All staff to promote leg exercises                                                               |                                                |  |
| If INR $\leq$ 1.5 give low molecular weight Heparin at 18:00 hours (to be given in leg)          |                                                |  |
| If INR $\geq$ 1.5 let surgeons know                                                              |                                                |  |
| Antiemetic stockings in situ                                                                     |                                                |  |
| Sit patient out of bed in chair:<br>(If in critical care, see mobilising ERP patients guideline) | For breakfast<br>For lunch<br>For evening meal |  |
| Encourage mobilising to dining room or day room where available                                  |                                                |  |
| Aim for 4 x 60 metres walks a day:                                                               | Walk 1                                         |  |
|                                                                                                  | Walk 2                                         |  |
|                                                                                                  | Walk 3                                         |  |
|                                                                                                  | Walk 4                                         |  |

**Eating & Drinking**

|                                                                                                                         |                               |  |
|-------------------------------------------------------------------------------------------------------------------------|-------------------------------|--|
| Buccastem given regularly                                                                                               |                               |  |
| Encourage free fluids                                                                                                   |                               |  |
| Fluid input IV and or oral as per Trust guidelines.                                                                     |                               |  |
| Ensure any temporarily unused cannulas are flushed PRN to remain patent. Complete Visual Infusion Phlebitis (VIP) score |                               |  |
| Gives 3 supplement drinks a day, chart on fluid balance:                                                                | Drink 1<br>Drink 2<br>Drink 3 |  |
| Encourage three meals a day in addition to supplements                                                                  |                               |  |
| Sugar free chewing gum given 15 mins tds                                                                                |                               |  |
| Weigh patient and document weight (kg) in notes                                                                         |                               |  |

**Elimination**

|                                     |  |  |
|-------------------------------------|--|--|
| Maintain accurate fluid balance     |  |  |
| Document bowel sounds and movements |  |  |

**Infection**

|                                                                   |  |  |
|-------------------------------------------------------------------|--|--|
| Maintain normothermia, report pyrexia to surgeons                 |  |  |
| Surgical review, consider drain removal, urinary catheter removal |  |  |
| Check surgical wound, dressings                                   |  |  |

**Observations**

|                                                                |  |  |
|----------------------------------------------------------------|--|--|
| Early Warning Score (EWS) documented with regular observations |  |  |
|----------------------------------------------------------------|--|--|



**Communication**

| Protocol Instruction                                       | Achieved<br>v or x | Signature |
|------------------------------------------------------------|--------------------|-----------|
| Patient aware of today's goals                             |                    |           |
| Encourage patient to complete their diary                  |                    |           |
| Review discharge planning, see discharge plan on back page |                    |           |

**Pain**

|                                                |  |  |
|------------------------------------------------|--|--|
| Ensure Acute Pain Team aware of patient        |  |  |
| Follow Acute Pain Team plan / see weaning plan |  |  |

**Deep Breathing & Mobility**

|                                                                                   |                  |  |
|-----------------------------------------------------------------------------------|------------------|--|
| All staff to promote deep breathing                                               |                  |  |
| All staff to promote leg exercises                                                |                  |  |
| If INR ≤1.5 give low molecular weight Heparin at 18:00 hours (to be given in leg) |                  |  |
| If INR ≥1.5 let surgeons know                                                     |                  |  |
| Antiembotic stockings in situ                                                     |                  |  |
| Sit patient out of bed in chair:                                                  | For breakfast    |  |
|                                                                                   | For lunch        |  |
|                                                                                   | For evening meal |  |
| Encourage mobilising to dining room or day room where available                   |                  |  |
| Aim for 4 x 60 metres walks a day:                                                | Walk 1           |  |
|                                                                                   | Walk 2           |  |
|                                                                                   | Walk 3           |  |
|                                                                                   | Walk 4           |  |

**Eating & Drinking**

|                                                                                                                         |         |  |
|-------------------------------------------------------------------------------------------------------------------------|---------|--|
| Buccastem given regularly                                                                                               |         |  |
| Encourage free fluids                                                                                                   |         |  |
| Fluid input IV and or oral as per Trust guidelines.                                                                     |         |  |
| Ensure any temporarily unused cannulas are flushed PRN to remain patent. Complete Visual Infusion Phlebitis (VIP) score |         |  |
| Gives 3 supplement drinks a day, chart on fluid balance:                                                                | Drink 1 |  |
|                                                                                                                         | Drink 2 |  |
|                                                                                                                         | Drink 3 |  |
| Encourage three meals a day in addition to supplements                                                                  |         |  |
| Sugar free chewing gum given 15 mins tds                                                                                |         |  |

**Elimination**

|                                     |  |  |
|-------------------------------------|--|--|
| Maintain accurate fluid balance     |  |  |
| Document bowel sounds and movements |  |  |

**Infection**

|                                                                   |  |  |
|-------------------------------------------------------------------|--|--|
| Maintain normothermia, report pyrexia to surgeons                 |  |  |
| Surgical review, consider drain removal, urinary catheter removal |  |  |
| Check surgical wound, dressings                                   |  |  |

**Observations**

|                                                                |  |  |
|----------------------------------------------------------------|--|--|
| Early Warning Score (EWS) documented with regular observations |  |  |
|----------------------------------------------------------------|--|--|

**Communication**

| Protocol Instruction                                       | Achieved<br>✓ or ✗ | Signature |
|------------------------------------------------------------|--------------------|-----------|
| Patient aware of today's goals                             |                    |           |
| Encourage patient to complete their diary                  |                    |           |
| Review discharge planning, see discharge plan on back page |                    |           |

**Pain**

|                                                |  |  |
|------------------------------------------------|--|--|
| Ensure Acute Pain Team aware of patient        |  |  |
| Follow Acute Pain Team plan / see weaning plan |  |  |

**Deep Breathing & Mobility**

|                                                                                         |                  |  |
|-----------------------------------------------------------------------------------------|------------------|--|
| All staff to promote deep breathing                                                     |                  |  |
| All staff to promote leg exercises                                                      |                  |  |
| If INR $\leq 1.5$ give low molecular weight Heparin at 18:00 hours (to be given in leg) |                  |  |
| If INR $\geq 1.5$ let surgeons know                                                     |                  |  |
| Antiemetic stockings in situ                                                            |                  |  |
| Sit patient out of bed in chair:                                                        | For breakfast    |  |
|                                                                                         | For lunch        |  |
|                                                                                         | For evening meal |  |
| Encourage mobilising to dining room or day room where available                         |                  |  |
| Aim for 4 x 60 metres walks a day:                                                      | Walk 1           |  |
|                                                                                         | Walk 2           |  |
|                                                                                         | Walk 3           |  |
|                                                                                         | Walk 4           |  |

**Eating & Drinking**

|                                                                                                                         |         |  |
|-------------------------------------------------------------------------------------------------------------------------|---------|--|
| Buccastem given regularly                                                                                               |         |  |
| Encourage free fluids                                                                                                   |         |  |
| Fluid input IV and or oral as per Trust guidelines.                                                                     |         |  |
| Ensure any temporarily unused cannulas are flushed PRN to remain patent. Complete Visual Infusion Phlebitis (VIP) score |         |  |
| Gives 3 supplement drinks a day, chart on fluid balance:                                                                | Drink 1 |  |
|                                                                                                                         | Drink 2 |  |
|                                                                                                                         | Drink 3 |  |
| Encourage three meals a day in addition to supplements                                                                  |         |  |
| Sugar free chewing gum given 15 mins tds                                                                                |         |  |
| Weigh patient and document weight (kg) in notes                                                                         |         |  |

**Elimination**

|                                     |  |  |
|-------------------------------------|--|--|
| Maintain accurate fluid balance     |  |  |
| Document bowel sounds and movements |  |  |

**Infection**

|                                                                   |  |  |
|-------------------------------------------------------------------|--|--|
| Maintain normothermia, report pyrexia to surgeons                 |  |  |
| Surgical review, consider drain removal, urinary catheter removal |  |  |
| Check surgical wound, dressings                                   |  |  |

**Observations**

|                                                                |  |  |
|----------------------------------------------------------------|--|--|
| Early Warning Score (EWS) documented with regular observations |  |  |
|----------------------------------------------------------------|--|--|

**Communication**

| Protocol Instruction                                       | Achieved<br>✓ or ✗ | Signature |
|------------------------------------------------------------|--------------------|-----------|
| Patient aware of today's goals                             |                    |           |
| Encourage patient to complete their diary                  |                    |           |
| Review discharge planning, see discharge plan on back page |                    |           |

**Pain**

|                                                |  |  |
|------------------------------------------------|--|--|
| Ensure Acute Pain Team aware of patient        |  |  |
| Follow Acute Pain Team plan / see weaning plan |  |  |

**Deep Breathing & Mobility**

|                                                                                         |                  |  |
|-----------------------------------------------------------------------------------------|------------------|--|
| All staff to promote deep breathing                                                     |                  |  |
| All staff to promote leg exercises                                                      |                  |  |
| If INR $\leq 1.5$ give low molecular weight Heparin at 18:00 hours (to be given in leg) |                  |  |
| If INR $\geq 1.5$ let surgeons know                                                     |                  |  |
| Antiemebolic stockings in situ                                                          |                  |  |
| Sit patient out of bed in chair:                                                        | For breakfast    |  |
|                                                                                         | For lunch        |  |
|                                                                                         | For evening meal |  |
| Encourage mobilising to dining room or day room where available                         |                  |  |
| Aim for 4 x 60 metres walks a day:                                                      | Walk 1           |  |
|                                                                                         | Walk 2           |  |
|                                                                                         | Walk 3           |  |
|                                                                                         | Walk 4           |  |

**Eating & Drinking**

|                                                                                                                         |         |  |
|-------------------------------------------------------------------------------------------------------------------------|---------|--|
| Buccastem given regularly                                                                                               |         |  |
| Encourage free fluids                                                                                                   |         |  |
| Fluid input IV and or oral as per Trust guidelines.                                                                     |         |  |
| Ensure any temporarily unused cannulas are flushed PRN to remain patent. Complete Visual Infusion Phlebitis (VIP) score |         |  |
| Gives 3 supplement drinks a day, chart on fluid balance:                                                                | Drink 1 |  |
|                                                                                                                         | Drink 2 |  |
|                                                                                                                         | Drink 3 |  |
| Encourage three meals a day in addition to supplements                                                                  |         |  |
| Sugar free chewing gum given 15 mins tds                                                                                |         |  |

**Elimination**

|                                     |  |  |
|-------------------------------------|--|--|
| Maintain accurate fluid balance     |  |  |
| Document bowel sounds and movements |  |  |

**Infection**

|                                                                   |  |  |
|-------------------------------------------------------------------|--|--|
| Maintain normothermia, report pyrexia to surgeons                 |  |  |
| Surgical review, consider drain removal, urinary catheter removal |  |  |
| Check surgical wound, dressings                                   |  |  |

**Observations**

|                                                                |  |  |
|----------------------------------------------------------------|--|--|
| Early Warning Score (EWS) documented with regular observations |  |  |
|----------------------------------------------------------------|--|--|

For additional days, please continue to document any protocol instructions not achieved as a variance in the notes.

# PROOF

## Discharge Planning:

### Referrals to consider:

| Protocol Instruction                                                                  | Date | Initial |
|---------------------------------------------------------------------------------------|------|---------|
| Referral to Carers Service to support relatives caring for the patient upon discharge |      |         |
| Referral to social worker if needed                                                   |      |         |
| Referral to occupational therapist if needed                                          |      |         |

| Instruction                                                                                                            | Date | Initial |
|------------------------------------------------------------------------------------------------------------------------|------|---------|
| Drugs ordered to take home                                                                                             |      |         |
| Patient / family competent to administer subcutaneous low molecular weight heparin.<br>If not District Nurse organised |      |         |
| District Nurse referral made if required                                                                               |      |         |
| Date for removal of clips by practice nurse                                                                            |      |         |
| Outpatient appointment made                                                                                            |      |         |
| Ward telephone number given                                                                                            |      |         |
| Transport if needed                                                                                                    |      |         |
| Post op care advice given                                                                                              |      |         |
| Complete discharge checklist on Elective Surgical Pathway (Blue) on day of discharge                                   |      |         |

Date: \_\_\_\_\_ Time: \_\_\_\_\_ Surgically fit for discharge

Date: \_\_\_\_\_ Time: \_\_\_\_\_ Of actual discharge
